# Supplementary material for: Predictive ability of the American Society of Anaesthesiologists physical status classification system on health-related quality of life of patients after total hip replacement: comparisons across eight EQ-5D-3L value sets
Source: PubMed Central journal article supplement (PMC7339530; doi:10.1186/s12891-020-03399-8), 2020-07-06
Supplement: 12891_2020_3399_MOESM1_ESM.pdf [file 12891_2020_3399_MOESM1_ESM.pdf]

## **Additional file 1**

**Title:** Predictive ability of the American Society of Anaesthesiologists physical status classification system on health-related quality of life of patients after total hip replacement: Comparisons across eight EQ-5D-3L value sets

**Journal:** BMC Musculoskeletal Disorders

**Authors:** Fitsum Sebsibe Teni, Kristina Burström, Jenny Berg, Reiner Leidl and Ola Rolfson

### **Corresponding author**

Fitsum Sebsibe Teni

Health Outcomes and Economic Evaluation Research Group, Stockholm Centre for Healthcare Ethics, Department of Learning Informatics, Management and Ethics (LIME), Karolinska Institutet, Stockholm, Sweden

Email: [fitsum.teni@ki.se](mailto:fitsum.teni@ki.se)

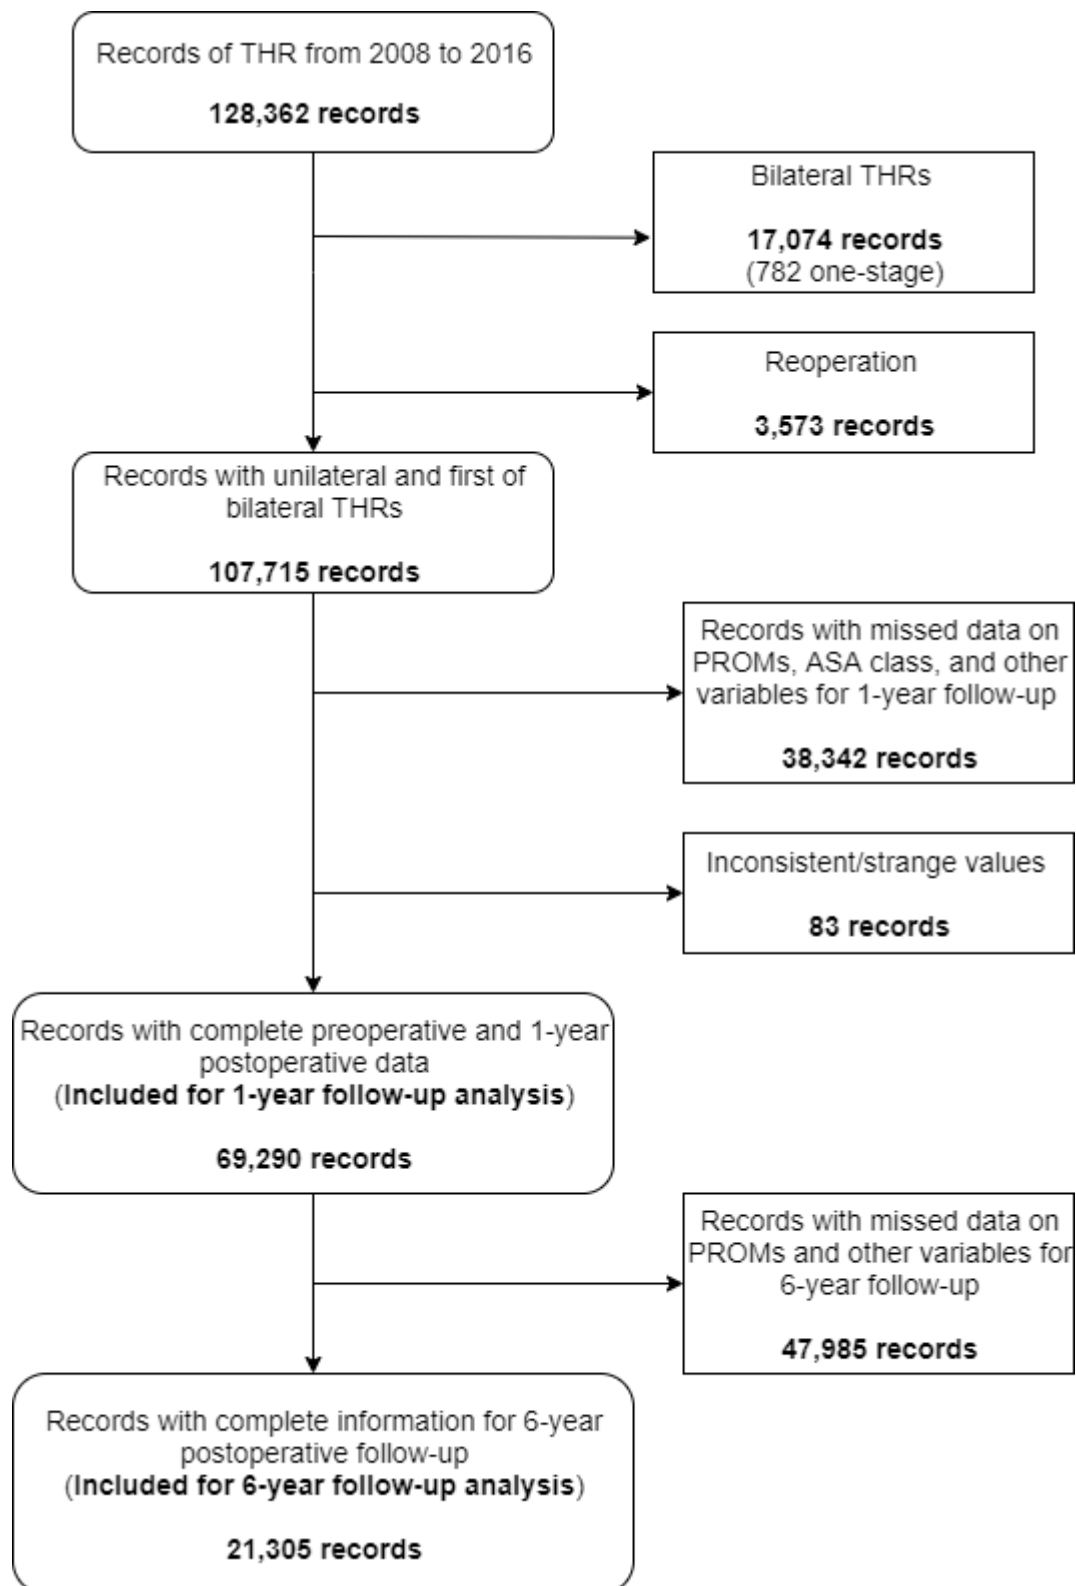

Figure S1: Sampling procedure

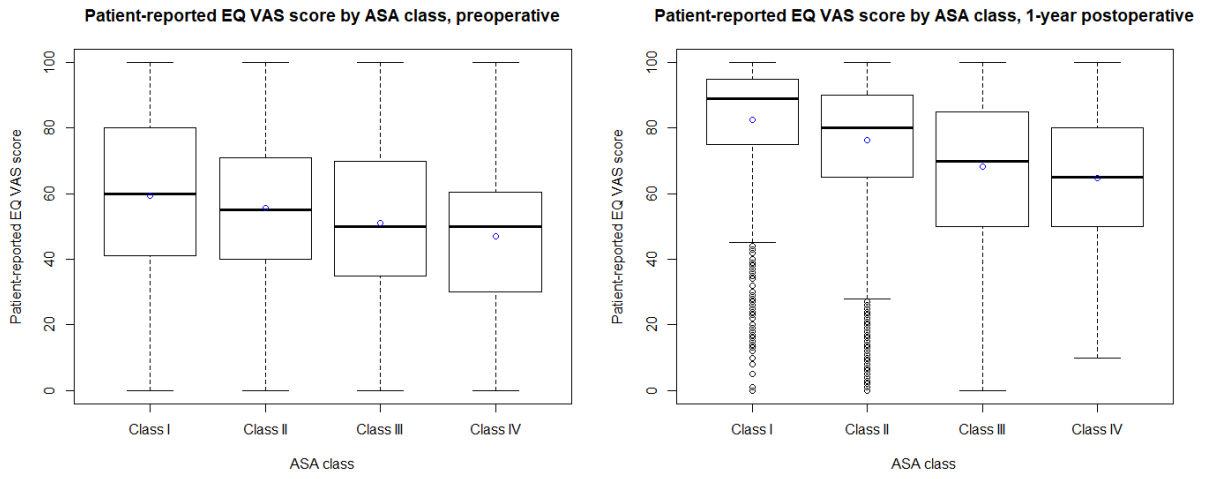

**Figure S2: Patient-reported EQ VAS score by ASA class pre- and 1 year postoperatively (n=69,290)**

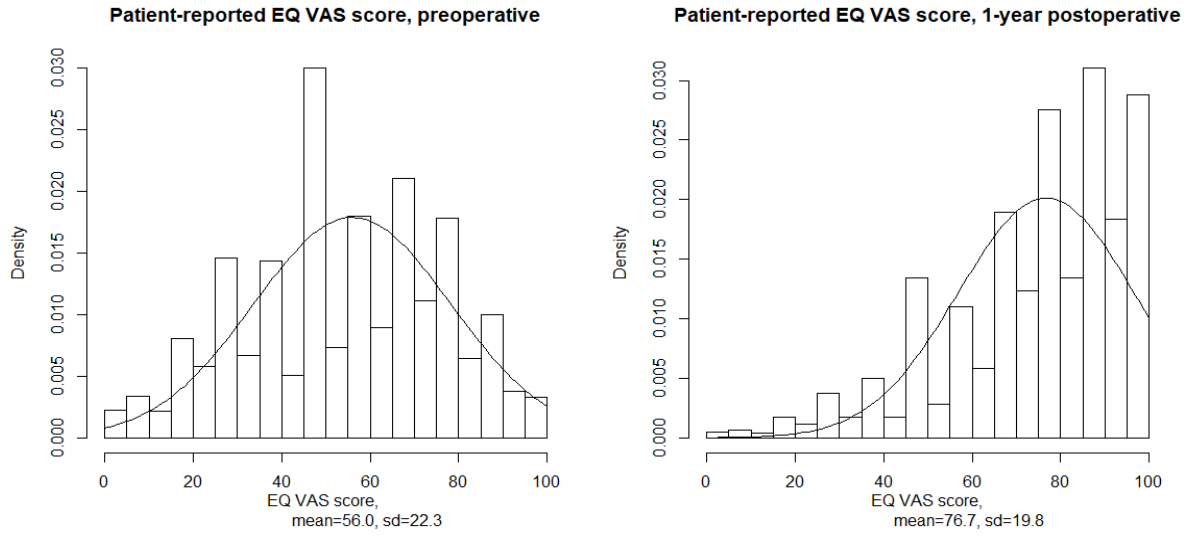

**Figure S3: Patient-reported EQ VAS score pre- and 1 year postoperatively (n= 69,290)**

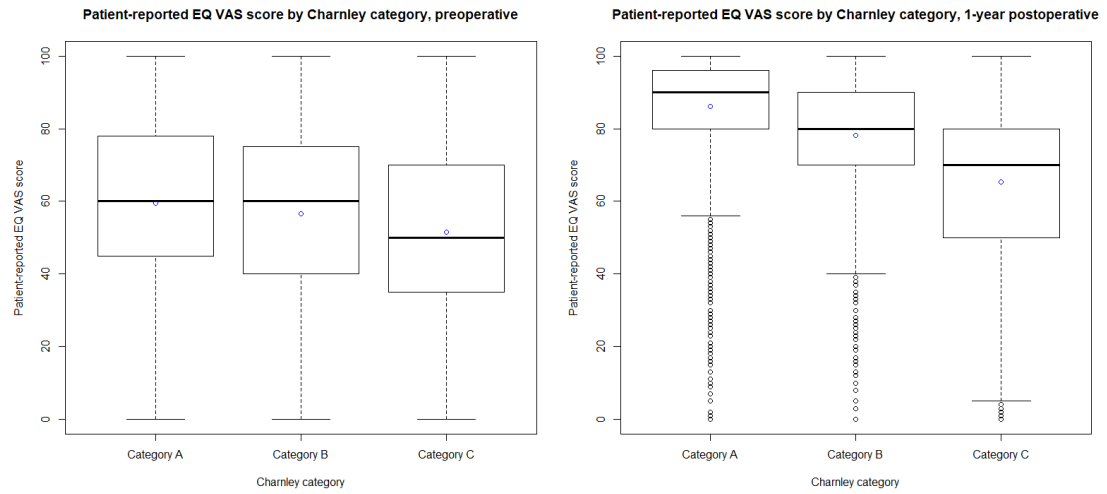

**Figure S4: Patient-reported EQ VAS score by Charnley category pre- and 1 year postoperatively (n= 69,290)**

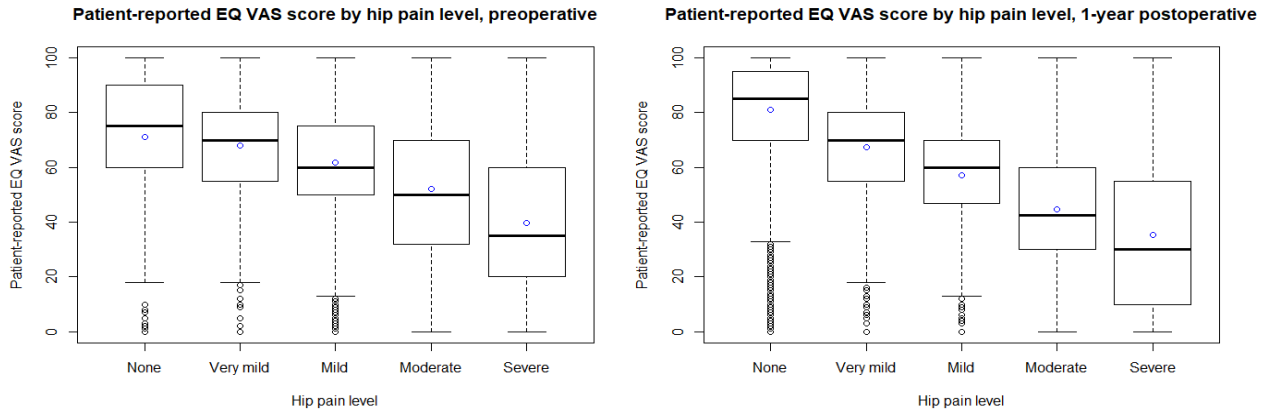

**Figure S5: Patient-reported EQ VAS score by hip pain, pre- and 1 year postoperatively (n=69,290)**

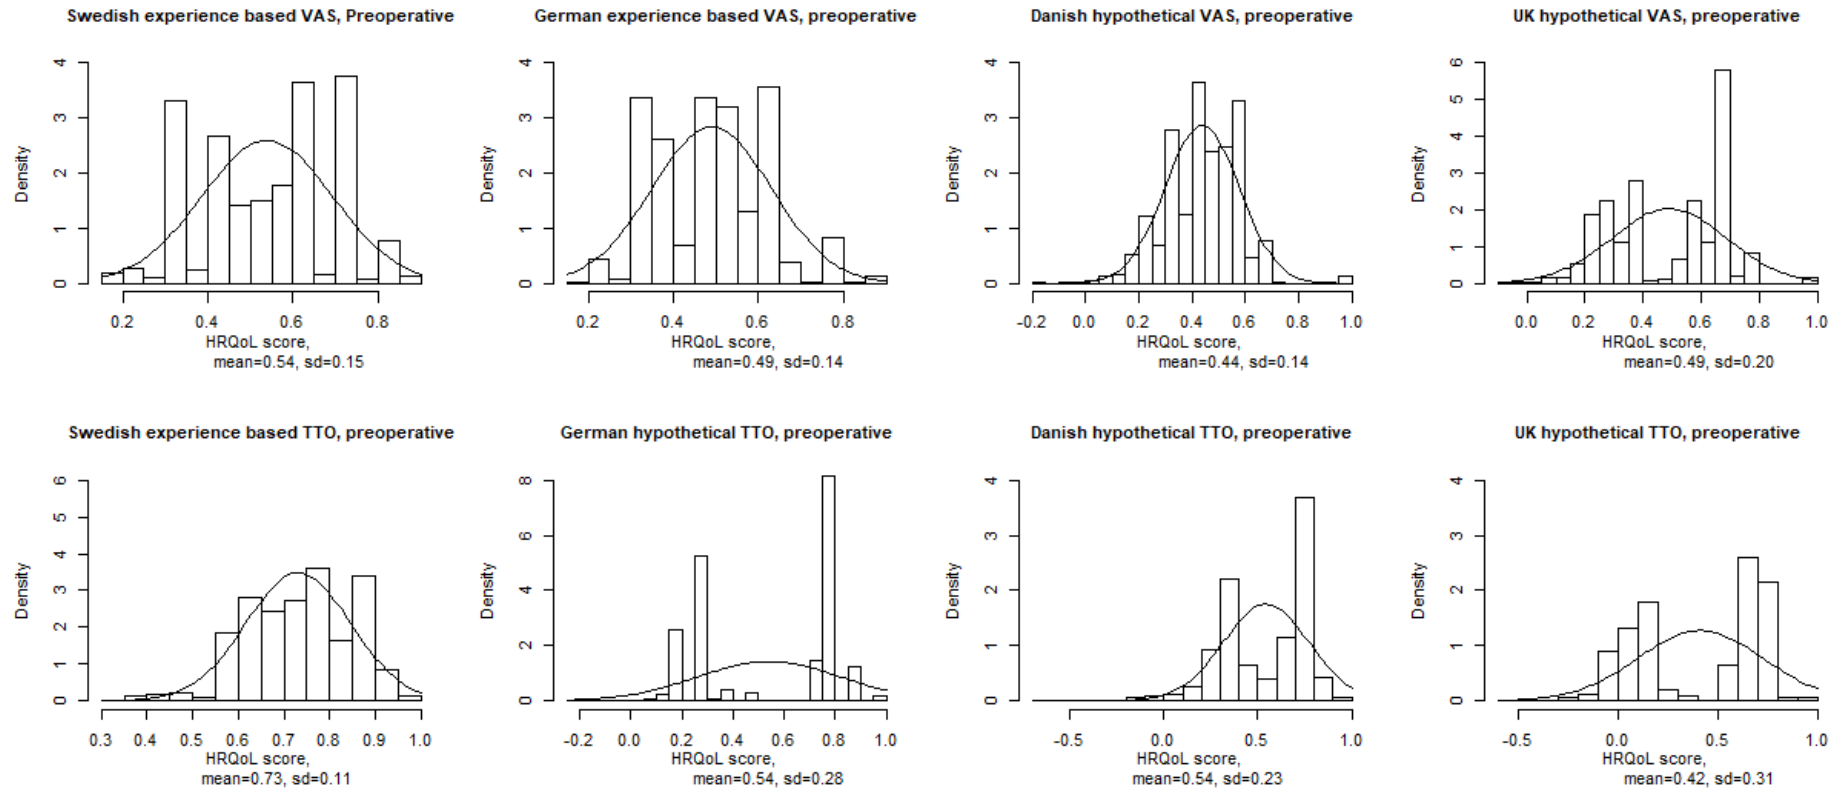

Figure S6: Distributions of EQ-5D indices based on the value sets preoperatively (n=69,290)

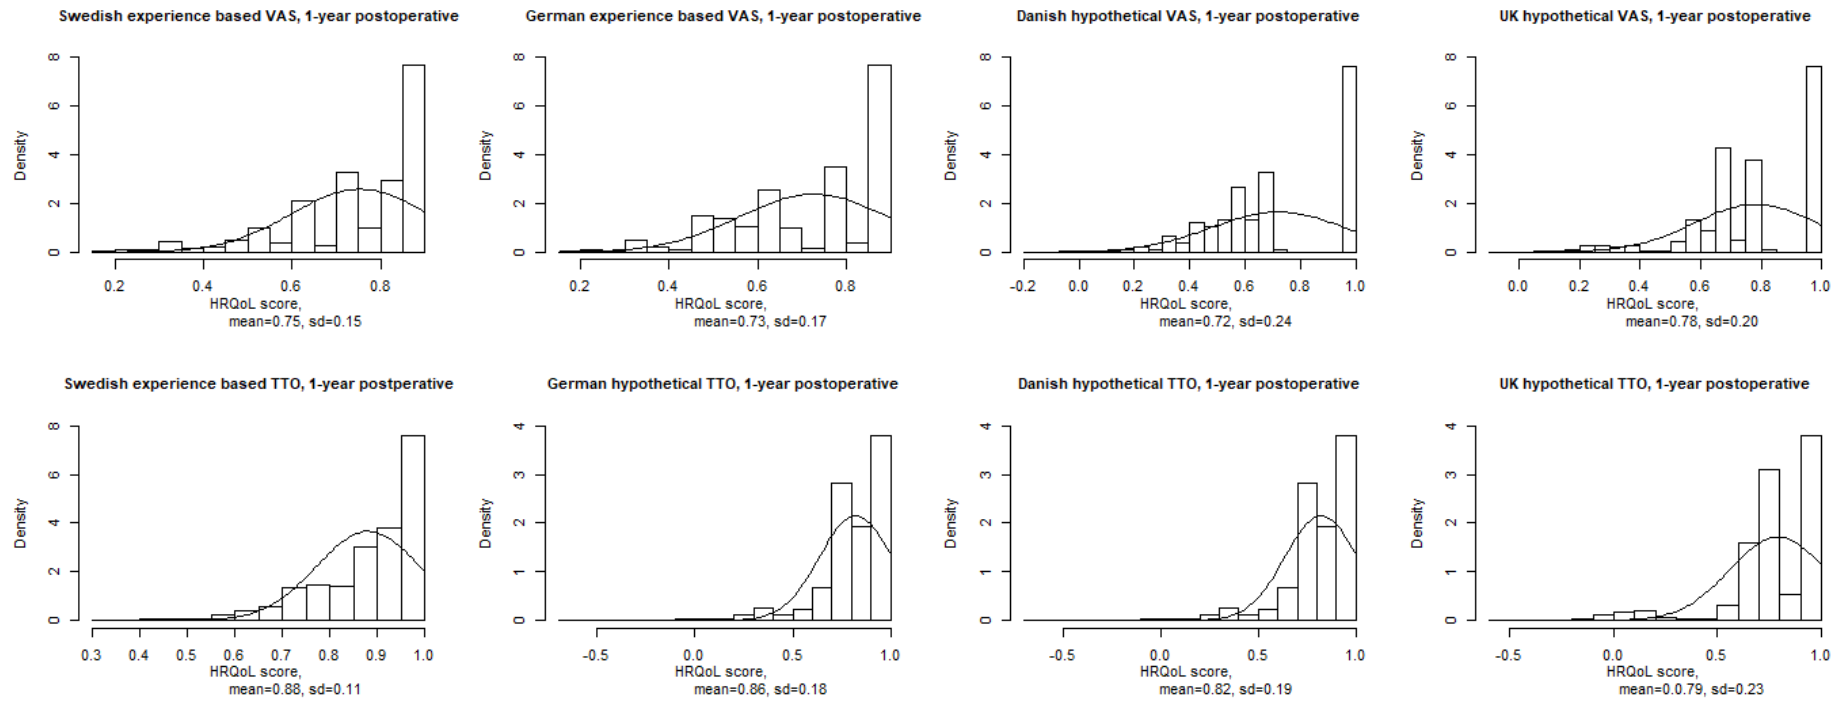

**Figure S7: Distributions of EQ-5D indices based on the value sets 1 year postoperatively (n=69,290)**



## Findings of the 6-year postoperative follow-up

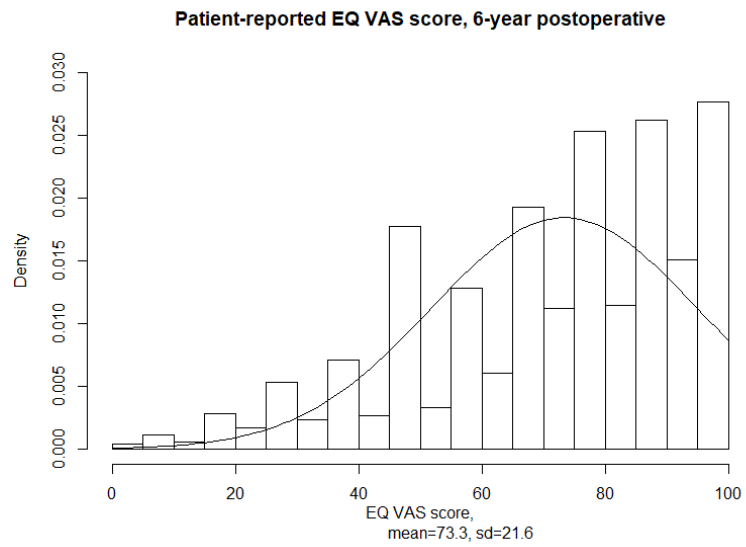

**Figure S8: Patient-reported EQ VAS score 6 years postoperatively (n=21,305)**

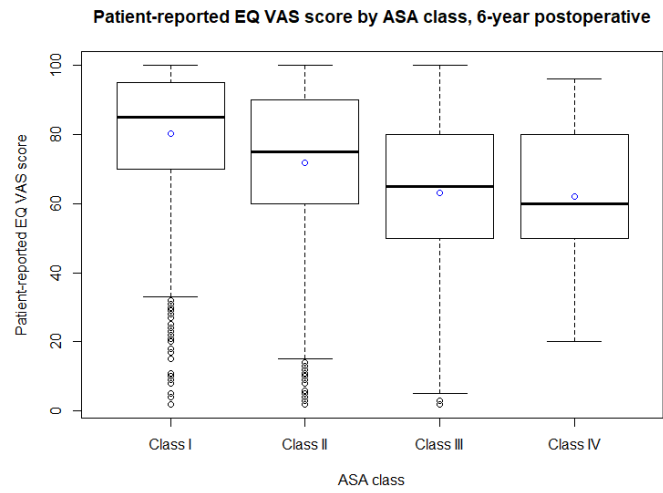

**Figure S9: Patient-reported EQ VAS score by ASA class 6 years postoperatively (n=21,305)**

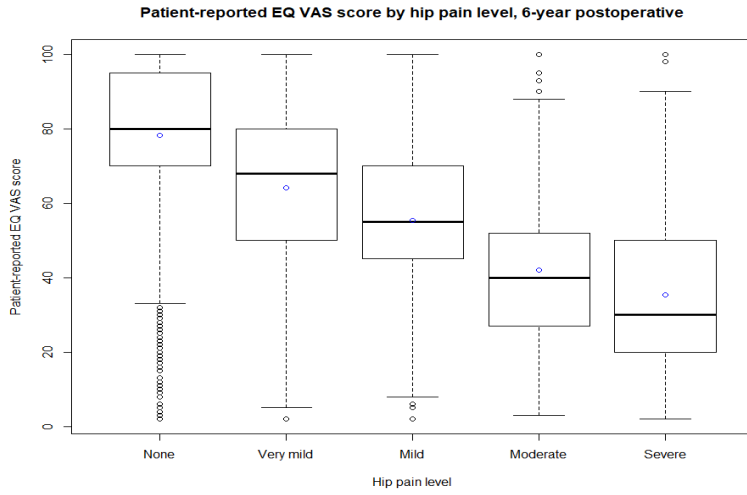

**Figure S10: Patient-reported EQ VAS score by hip pain level 6 years postoperatively (n=21,305)**

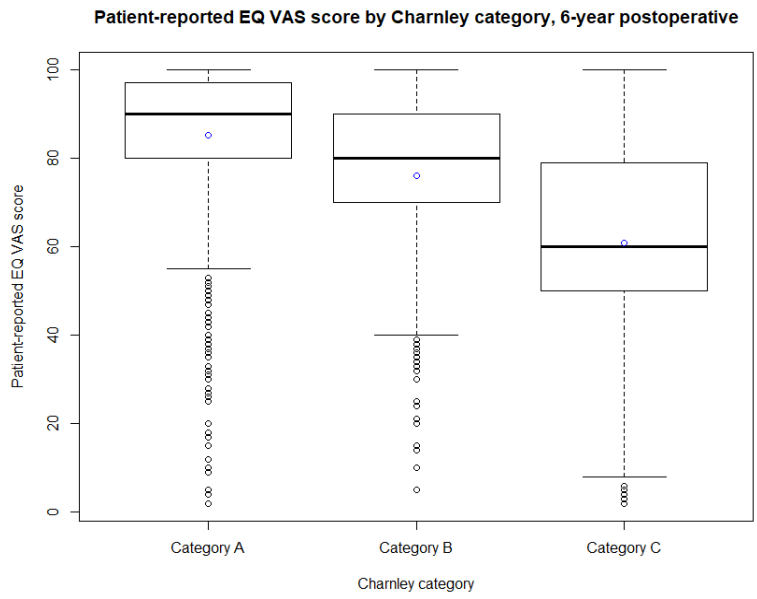

**Figure S11: Patient-reported EQ VAS score by Charnley class, 6 years postoperatively (n=21,305)**

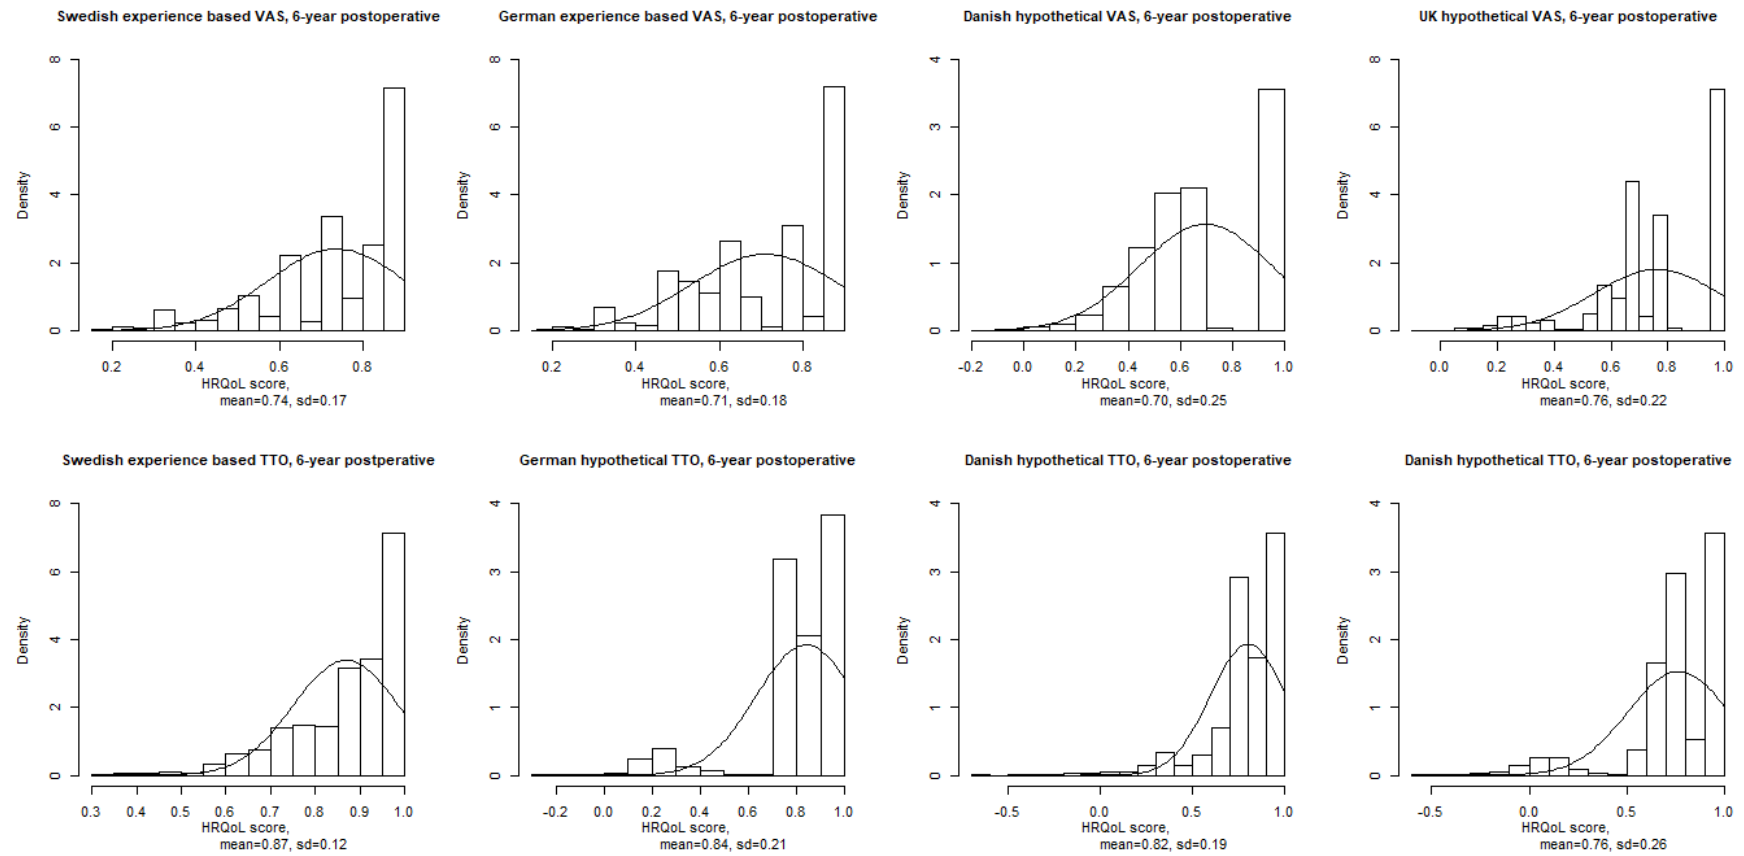

**Figure S12: Distributions of EQ-5D indices based on the value sets 6 years postoperatively (n=21,305)**

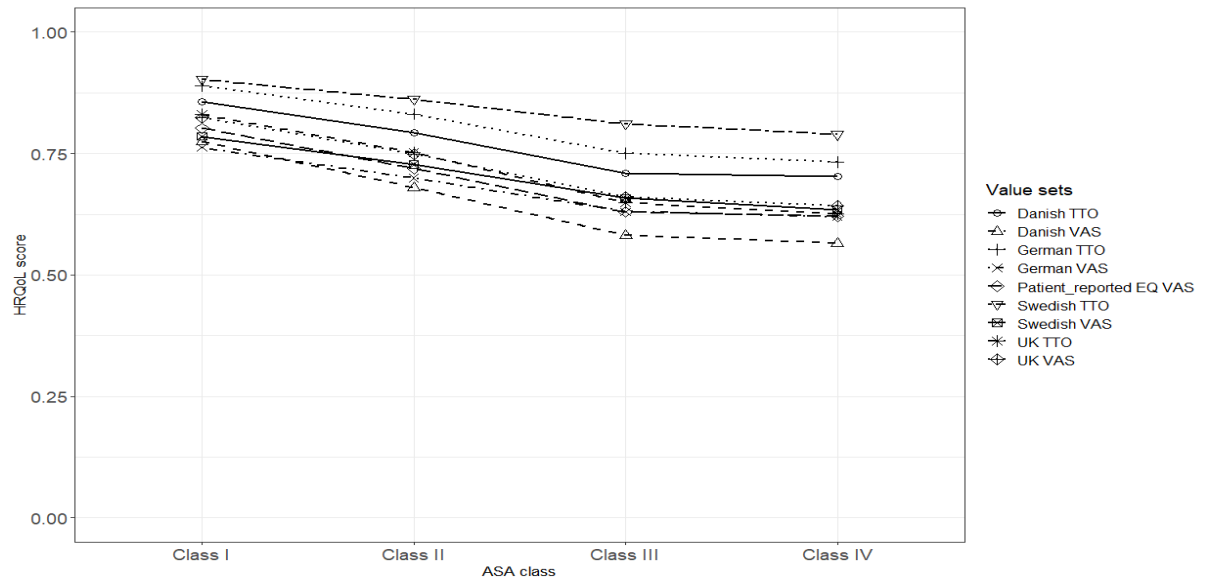

**Figure S13: Mean EQ-5D indices and patient-reported EQ VAS score by ASA class, 6 years postoperatively (n= 21,305)**
