# Supplementary material for: Predictive ability of the American Society of Anaesthesiologists physical status classification system on health-related quality of life of patients after total hip replacement: comparisons across eight EQ-5D-3L value sets
Source: Springer Nature journal article supplement (doi:10.1186/s12891-020-03399-8), 2020-07-06
Supplement: MOESM2 [file 18151248]

## **Additional file 2**

**Title:** Predictive ability of the American Society of Anaesthesiologists physical status classification system on health-related quality of life of patients after total hip replacement: Comparisons across eight EQ-5D-3L value sets

**Journal:** BMC Musculoskeletal Disorders

**Authors:** Fitsum Sebsibe Teni, Kristina Burström, Jenny Berg, Reiner Leidl and Ola Rolfson

### **Corresponding author**

Fitsum Sebsibe Teni

Health Outcomes and Economic Evaluation Research Group, Stockholm Centre for Healthcare Ethics, Department of Learning Informatics, Management and Ethics (LIME), Karolinska Institutet, Stockholm, Sweden

Email: [fitsum.teni@ki.se](mailto:fitsum.teni@ki.se)

**Table S1: Prevalence of reported problems in the EQ-5D dimensions by ASA class pre- and 1 year postoperatively (n=69,290)**

| EQ-5D dimension             | ASA class |        |          |        |           |       |          |     |
|-----------------------------|-----------|--------|----------|--------|-----------|-------|----------|-----|
|                             | Class I   |        | Class II |        | Class III |       | Class IV |     |
|                             | %         | n      | %        | n      | %         | n     | %        | n   |
| <b>Preoperative</b>         |           |        |          |        |           |       |          |     |
| Mobility                    |           |        |          |        |           |       |          |     |
| No problem                  | 10.5      | 1,868  | 7.3      | 3011   | 4.7       | 462   | 4.6      | 10  |
| Some problems               | 89.4      | 15,926 | 92.5     | 38370  | 94.5      | 9223  | 92.7     | 203 |
| Confined to bed             | 0.2       | 28     | 0.3      | 111    | 0.7       | 72    | 2.7      | 6   |
| Self-care                   |           |        |          |        |           |       |          |     |
| No problem                  | 82.3      | 14,667 | 77.3     | 32089  | 68.2      | 6655  | 57.5     | 126 |
| Some problems               | 17.2      | 3,059  | 21.9     | 9069   | 30.0      | 2929  | 37.9     | 83  |
| Unable to                   | 0.5       | 96     | 0.8      | 334    | 1.8       | 173   | 4.6      | 10  |
| Usual activities            |           |        |          |        |           |       |          |     |
| No problem                  | 43.0      | 7,664  | 39.1     | 16243  | 31.4      | 3065  | 21.0     | 46  |
| Some problems               | 49.0      | 8,725  | 51.1     | 21208  | 54.1      | 5282  | 58.4     | 128 |
| Unable to                   | 8.0       | 1,433  | 9.7      | 4041   | 14.5      | 1410  | 20.5     | 45  |
| Pain/discomfort             |           |        |          |        |           |       |          |     |
| No problem                  | 1.5       | 276    | 1.5      | 635    | 1.3       | 124   | 1.4      | 3   |
| Moderate problems           | 62.1      | 11,069 | 56.7     | 23509  | 48.4      | 4722  | 37.0     | 81  |
| Extreme problems            | 36.3      | 6,477  | 41.8     | 17348  | 50.3      | 4911  | 61.6     | 135 |
| Anxiety/depression          |           |        |          |        |           |       |          |     |
| No problem                  | 63.5      | 11,314 | 57.9     | 24007  | 52.0      | 5074  | 49.8     | 109 |
| Moderate problems           | 33.9      | 6,042  | 38.8     | 16100  | 43.1      | 4208  | 43.4     | 95  |
| Extreme problems            | 2.6       | 466    | 3.3      | 1385   | 4.9       | 475   | 6.8      | 15  |
| <b>1-year postoperative</b> |           |        |          |        |           |       |          |     |
| Mobility                    |           |        |          |        |           |       |          |     |
| No problem                  | 75.3      | 13,426 | 59.6     | 24,722 | 41.5      | 4,048 | 34.7     | 76  |
| Some problems               | 24.6      | 4,389  | 40.3     | 16,725 | 58.2      | 5,683 | 64.4     | 141 |
| Confined to bed             | 0.0       | 7      | 0.1      | 45     | 0.3       | 26    | 0.9      | 2   |
| Self-care                   |           |        |          |        |           |       |          |     |
| No problem                  | 96.1      | 17,131 | 93.0     | 38,588 | 85.9      | 8,382 | 79.0     | 173 |
| Some problems               | 3.7       | 659    | 6.5      | 2,696  | 12.9      | 1,255 | 18.3     | 40  |
| Unable to                   | 0.2       | 32     | 0.5      | 208    | 1.2       | 120   | 2.7      | 6   |
| Usual activities            |           |        |          |        |           |       |          |     |
| No problem                  | 85.8      | 15,292 | 78.0     | 32,384 | 64.1      | 6,258 | 49.3     | 108 |
| Some problems               | 13.3      | 2,376  | 20.2     | 8,401  | 31.9      | 3,108 | 45.2     | 99  |
| Unable to                   | 0.9       | 154    | 1.7      | 707    | 4.0       | 391   | 5.5      | 12  |
| Pain/discomfort             |           |        |          |        |           |       |          |     |
| No problem                  | 54.7      | 9,744  | 43.2     | 17,912 | 33.4      | 3,256 | 29.7     | 65  |
| Moderate problems           | 42.9      | 7,640  | 52.2     | 21,661 | 58.9      | 5,745 | 62.6     | 137 |
| Extreme problems            | 2.5       | 438    | 4.6      | 1,919  | 7.7       | 756   | 7.8      | 17  |
| Anxiety/depression          |           |        |          |        |           |       |          |     |
| No problem                  | 85.1      | 15,174 | 78.3     | 32,485 | 69.1      | 6,744 | 65.3     | 143 |
| Moderate problems           | 13.9      | 2,485  | 20.4     | 8,445  | 28.5      | 2,778 | 32.4     | 71  |
| Extreme problems            | 0.9       | 163    | 1.4      | 562    | 2.4       | 235   | 2.3      | 5   |

**Table S2: Mean and median EQ-5D indices based on the different value sets among THR patients by ASA class pre- and 1 year postoperatively (n=69,290)**

| ASA class | Preoperative         |            |            |        |             |            |            |        |
|-----------|----------------------|------------|------------|--------|-------------|------------|------------|--------|
|           | Swedish VAS          | German VAS | Danish VAS | UK VAS | Swedish TTO | German TTO | Danish TTO | UK TTO |
| Class I   |                      |            |            |        |             |            |            |        |
| Mean      | 0.56                 | 0.51       | 0.46       | 0.52   | 0.75        | 0.58       | 0.58       | 0.46   |
| SD        | 0.15                 | 0.14       | 0.14       | 0.19   | 0.11        | 0.27       | 0.22       | 0.30   |
| Median    | 0.60                 | 0.54       | 0.48       | 0.60   | 0.77        | 0.79       | 0.66       | 0.62   |
| Class II  |                      |            |            |        |             |            |            |        |
| Mean      | 0.54                 | 0.49       | 0.44       | 0.49   | 0.73        | 0.54       | 0.54       | 0.42   |
| SD        | 0.15                 | 0.14       | 0.14       | 0.20   | 0.11        | 0.28       | 0.23       | 0.31   |
| Median    | 0.57                 | 0.49       | 0.43       | 0.57   | 0.74        | 0.70       | 0.66       | 0.59   |
| Class III |                      |            |            |        |             |            |            |        |
| Mean      | 0.50                 | 0.46       | 0.40       | 0.44   | 0.70        | 0.48       | 0.49       | 0.34   |
| SD        | 0.15                 | 0.14       | 0.14       | 0.20   | 0.12        | 0.28       | 0.24       | 0.32   |
| Median    | 0.50                 | 0.46       | 0.42       | 0.39   | 0.71        | 0.29       | 0.44       | 0.20   |
| Class IV  |                      |            |            |        |             |            |            |        |
| Mean      | 0.46                 | 0.42       | 0.36       | 0.38   | 0.67        | 0.40       | 0.41       | 0.25   |
| SD        | 0.15                 | 0.13       | 0.16       | 0.20   | 0.12        | 0.28       | 0.26       | 0.32   |
| Median    | 0.45                 | 0.37       | 0.36       | 0.36   | 0.67        | 0.26       | 0.39       | 0.16   |
| Overall   |                      |            |            |        |             |            |            |        |
| Mean      | 0.54                 | 0.49       | 0.44       | 0.49   | 0.73        | 0.54       | 0.54       | 0.42   |
| SD        | 0.15                 | 0.14       | 0.14       | 0.20   | 0.12        | 0.28       | 0.23       | 0.31   |
| Median    | 0.57                 | 0.49       | 0.43       | 0.57   | 0.74        | 0.70       | 0.66       | 0.59   |
|           | 1-year postoperative |            |            |        |             |            |            |        |
| Class I   |                      |            |            |        |             |            |            |        |
| Mean      | 0.80                 | 0.77       | 0.79       | 0.84   | 0.91        | 0.90       | 0.87       | 0.85   |
| SD        | 0.13                 | 0.15       | 0.23       | 0.18   | 0.09        | 0.15       | 0.16       | 0.20   |
| Median    | 0.82                 | 0.81       | 0.71       | 0.81   | 0.94        | 1.00       | 0.84       | 0.88   |
| Class II  |                      |            |            |        |             |            |            |        |
| Mean      | 0.75                 | 0.72       | 0.71       | 0.78   | 0.88        | 0.86       | 0.82       | 0.79   |
| SD        | 0.15                 | 0.17       | 0.24       | 0.20   | 0.11        | 0.18       | 0.18       | 0.23   |
| Median    | 0.82                 | 0.76       | 0.70       | 0.76   | 0.94        | 0.89       | 0.82       | 0.80   |
| Class III |                      |            |            |        |             |            |            |        |
| Mean      | 0.69                 | 0.66       | 0.62       | 0.70   | 0.84        | 0.80       | 0.76       | 0.71   |
| SD        | 0.17                 | 0.18       | 0.24       | 0.22   | 0.12        | 0.22       | 0.21       | 0.27   |
| Median    | 0.72                 | 0.65       | 0.57       | 0.69   | 0.87        | 0.79       | 0.77       | 0.73   |
| Class IV  |                      |            |            |        |             |            |            |        |
| Mean      | 0.66                 | 0.63       | 0.58       | 0.67   | 0.81        | 0.77       | 0.73       | 0.67   |
| SD        | 0.18                 | 0.18       | 0.24       | 0.22   | 0.13        | 0.22       | 0.21       | 0.28   |
| Median    | 0.62                 | 0.59       | 0.51       | 0.66   | 0.81        | 0.79       | 0.72       | 0.69   |
| Overall   |                      |            |            |        |             |            |            |        |
| Mean      | 0.75                 | 0.73       | 0.72       | 0.78   | 0.88        | 0.86       | 0.82       | 0.79   |
| SD        | 0.16                 | 0.17       | 0.24       | 0.20   | 0.11        | 0.18       | 0.18       | 0.23   |
| Median    | 0.82                 | 0.76       | 0.70       | 0.76   | 0.94        | 0.89       | 0.82       | 0.80   |

**Table S3: Post hoc Bonferroni adjusted p-values of pairwise tests of the one-way ANOVA test for abilities of value sets to differentiate among ASA classes pre- and 1 year postoperatively (n=69,290)**

| Follow-up                   | P-value     |            |                         |                     |             |                         |                         |                     |
|-----------------------------|-------------|------------|-------------------------|---------------------|-------------|-------------------------|-------------------------|---------------------|
|                             | Swedish VAS | German VAS | Danish VAS <sup>a</sup> | UK VAS <sup>a</sup> | Swedish TTO | German TTO <sup>a</sup> | Danish TTO <sup>a</sup> | UK TTO <sup>a</sup> |
| <b>Preoperative</b>         |             |            |                         |                     |             |                         |                         |                     |
| Class I, Class II           | <0.001      | <0.001     | <0.001                  | <0.001              | <0.001      | <0.001                  | <0.001                  | <0.001              |
| Class I, Class III          | <0.001      | <0.001     | <0.001                  | <0.001              | <0.001      | <0.001                  | <0.001                  | <0.001              |
| Class I, Class IV           | <0.001      | <0.001     | <0.001                  | <0.001              | <0.001      | <0.001                  | <0.001                  | <0.001              |
| Class II, Class III         | <0.001      | <0.001     | <0.001                  | <0.001              | <0.001      | <0.001                  | <0.001                  | <0.001              |
| Class II, Class IV          | <0.001      | <0.001     | <0.001                  | <0.001              | <0.001      | <0.001                  | <0.001                  | <0.001              |
| Class III, Class IV         | 0.001       | 0.002      | <0.001                  | <0.001              | <0.001      | <0.001                  | <0.001                  | <0.001              |
| <b>1-year postoperative</b> |             |            |                         |                     |             |                         |                         |                     |
| Class I, Class II           | <0.001      | <0.001     | <0.001                  | <0.001              | <0.001      | <0.001                  | <0.001                  | <0.001              |
| Class I, Class III          | <0.001      | <0.001     | <0.001                  | <0.001              | <0.001      | <0.001                  | <0.001                  | <0.001              |
| Class I, Class IV           | <0.001      | <0.001     | <0.001                  | <0.001              | <0.001      | <0.001                  | <0.001                  | <0.001              |
| Class II, Class III         | <0.001      | <0.001     | <0.001                  | <0.001              | <0.001      | <0.001                  | <0.001                  | <0.001              |
| Class II, Class IV          | <0.001      | <0.001     | <0.001                  | <0.001              | <0.001      | <0.001                  | <0.001                  | <0.001              |
| Class III, Class IV         | 0.006       | 0.022      | 0.018                   | 0.034               | 0.002       | 0.130                   | 0.065                   | 0.065               |

<sup>a</sup>Hypothetical perspective

**Table S4: Kruskal Wallis rank sum Test to assess abilities of value sets to differentiate HRQoL by ASA class (n=69,290)**

| Follow-up            | ASA class | Kruskal Wallis X <sup>2</sup> |            |                         |         |             |                         |                         |         |
|----------------------|-----------|-------------------------------|------------|-------------------------|---------|-------------|-------------------------|-------------------------|---------|
|                      |           | Swedish VAS                   | German VAS | Danish <sup>a</sup> VAS | UK VAS  | Swedish TTO | German <sup>a</sup> TTO | Danish <sup>a</sup> TTO | UK TTO  |
| Preoperative         | Class I   |                               |            |                         |         |             |                         |                         |         |
|                      | Class II  | 1014.1*                       | 941.4*     | 1230.7*                 | 1136.1* | 1035.2*     | 1014.3*                 | 1063.8*                 | 1095.1* |
|                      | Class III |                               |            |                         |         |             |                         |                         |         |
|                      | Class IV  |                               |            |                         |         |             |                         |                         |         |
| 1-year postoperative | Class I   |                               |            |                         |         |             |                         |                         |         |
|                      | Class II  | 3055.8*                       | 2925.0*    | 3253.1*                 | 3006.2* | 3162.2*     | 2790.6*                 | 2926.6*                 | 2833.9* |
|                      | Class III |                               |            |                         |         |             |                         |                         |         |
|                      | Class IV  |                               |            |                         |         |             |                         |                         |         |

<sup>a</sup>hypothetical perspective

\*P-value<0.001

**Table S5: Adjusted OLS models on the predictive effects of ASA class on HRQoL score based on the value sets preoperatively (n=69,290)**

| Model components            | Value sets/EQ VAS       |             |                    |                         |                     |                     |                         |                         |                     |
|-----------------------------|-------------------------|-------------|--------------------|-------------------------|---------------------|---------------------|-------------------------|-------------------------|---------------------|
|                             | Patient-reported EQ VAS | Swedish VAS | German VAS         | Danish VAS <sup>h</sup> | UK VAS <sup>h</sup> | Swedish TTO         | German TTO <sup>h</sup> | Danish TTO <sup>h</sup> | UK TTO <sup>h</sup> |
| Intercept                   | 0.735***                | 0.661***    | 0.621***           | 0.549***                | 0.656***            | 0.816***            | 0.778***                | 0.720***                | 0.670***            |
| ASA class <sup>a</sup>      |                         |             |                    |                         |                     |                     |                         |                         |                     |
| Class II                    | -0.030***               | -0.018***   | -0.015***          | -0.017***               | -0.018***           | -0.014***           | -0.019***               | -0.020***               | -0.026***           |
| Class III                   | -0.062***               | -0.038***   | -0.032***          | -0.040***               | -0.043***           | -0.030***           | -0.045***               | -0.049***               | -0.061***           |
| Class IV                    | -0.077***               | -0.052***   | -0.043***          | -0.058***               | -0.066***           | -0.043***           | -0.076***               | -0.079***               | -0.098***           |
| Age group <sup>b</sup>      |                         |             |                    |                         |                     |                     |                         |                         |                     |
| 50-59                       | 0.009 <sup>*</sup>      | 0.009***    | 0.007**            | 0.001***                | 0.008 <sup>*</sup>  | 0.007***            | 0.005                   | 0.010 <sup>*</sup>      | 0.011 <sup>*</sup>  |
| 60-69                       | 0.029***                | 0.033***    | 0.026***           | 0.028***                | 0.030***            | 0.025***            | 0.027***                | 0.036***                | 0.043***            |
| 70-79                       | 0.042***                | 0.042***    | 0.033***           | 0.033***                | 0.038***            | 0.032***            | 0.034***                | 0.045***                | 0.055***            |
| 80-98                       | 0.033***                | 0.030***    | 0.024***           | 0.018***                | 0.020***            | 0.022***            | 0.014**                 | 0.028***                | 0.030***            |
| Sex <sup>c</sup>            |                         |             |                    |                         |                     |                     |                         |                         |                     |
| Female                      | -0.037 <sup>*</sup>     | -0.018***   | -0.017***          | -0.009***               | -0.018***           | -0.010***           | -0.025***               | 0.024***                | -0.032***           |
| BMI category <sup>d</sup>   |                         |             |                    |                         |                     |                     |                         |                         |                     |
| Normal weight               | 0.009                   | 0.018**     | 0.013 <sup>*</sup> | 0.019**                 | 0.017 <sup>*</sup>  | 0.013**             | 0.012                   | 0.019 <sup>*</sup>      | 0.022               |
| Overweight                  | 0.009                   | 0.016**     | 0.011 <sup>*</sup> | 0.017***                | 0.014               | 0.011 <sup>*</sup>  | 0.007                   | 0.017 <sup>*</sup>      | 0.018               |
| Obese class I               | -0.004                  | 0.008       | 0.004              | 0.008                   | 0.002               | 0.005               | -0.008                  | 0.005                   | 0.0005              |
| Obese class II              | -0.004                  | 0.00004     | -0.003             | -0.002                  | -0.013              | -0.002              | -0.030**                | -0.010                  | -0.023              |
| Obese class III             | -0.009                  | -0.010      | -0.011             | -0.016 <sup>*</sup>     | -0.031**            | -0.012 <sup>*</sup> | -0.049***               | -0.034**                | -0.050***           |
| Laterality <sup>e</sup>     |                         |             |                    |                         |                     |                     |                         |                         |                     |
| Left                        | -0.0006                 | -0.0006     | -0.0006            | -0.0005                 | -0.0004             | -0.0005             | -0.003                  | -0.0004                 | -0.0005             |
| Charnley class <sup>f</sup> |                         |             |                    |                         |                     |                     |                         |                         |                     |
| Class B                     | -0.020***               | -0.015***   | -0.014***          | -0.016***               | -0.020***           | -0.012***           | -0.025***               | -0.022***               | -0.030***           |
| Class C                     | -0.056***               | -0.038***   | -0.034***          | -0.039***               | -0.042***           | -0.028***           | -0.046***               | -0.046***               | -0.059***           |
| Hip pain level <sup>g</sup> |                         |             |                    |                         |                     |                     |                         |                         |                     |
| Very mild                   | -0.032***               | -0.008      | -0.017***          | -0.024***               | -0.006              | -0.004              | -0.008                  | 0.003                   | 0.006               |
| Mild                        | -0.087***               | -0.055***   | -0.061***          | -0.063***               | -0.051***           | -0.038***           | -0.046***               | -0.044***               | -0.059***           |
| Moderate                    | -0.173***               | -0.172***   | -0.174***          | -0.145***               | -0.229***           | -0.121***           | -0.322***               | -0.251***               | -0.359***           |
| Severe                      | -0.281***               | -0.252***   | -0.243***          | -0.221***               | -0.340***           | -0.185***           | -0.471***               | -0.403***               | -0.542***           |
| Adjusted R <sup>2</sup>     | 0.138                   | 0.282       | 0.300              | 0.219                   | 0.338               | 0.268               | 0.357                   | 0.350                   | 0.360               |
| MAE                         | 0.171                   | 0.105       | 0.095              | 0.094                   | 0.126               | 0.079               | 0.180                   | 0.140                   | 0.199               |
| Normalized MAE              | 0.171                   | 0.146       | 0.134              | 0.080                   | 0.118               | 0.125               | 0.149                   | 0.086                   | 0.125               |
| RMSE                        | 0.207                   | 0.131       | 0.118              | 0.123                   | 0.160               | 0.098               | 0.225                   | 0.184                   | 0.250               |
| Normalized RMSE             | 0.207                   | 0.182       | 0.166              | 0.105                   | 0.149               | 0.156               | 0.186                   | 0.113                   | 0.157               |
| Spearman's Rank correlation | 0.353                   | 0.542       | 0.550              | 0.477                   | 0.563               | 0.508               | 0.568                   | 0.573                   | 0.573               |

Reference group: <sup>a</sup> Class I; <sup>b</sup> < 50; <sup>c</sup> Male; <sup>d</sup> Underweight; <sup>e</sup> Right; <sup>f</sup> Class A; <sup>g</sup> None; <sup>h</sup> hypothetical perspective; \*P-value<0.05; \*\*P-value<0.01; \*\*\*P-value<0.001

MAE: mean absolute error

RMSE; root mean square error

## Findings of the 6-year postoperative follow-up

**Table S6: Prevalence of reported problems in the EQ-5D dimensions by ASA class, 6 years postoperatively (n=21,305)**

| EQ-5D dimension    | ASA class |       |          |        |           |       |          |    |
|--------------------|-----------|-------|----------|--------|-----------|-------|----------|----|
|                    | Class I   |       | Class II |        | Class III |       | Class IV |    |
|                    | %         | n     | %        | n      | %         | n     | %        | n  |
| Mobility           |           |       |          |        |           |       |          |    |
| No problem         | 71.8      | 4,507 | 53.1     | 6,709  | 35.2      | 832   | 37.0     | 10 |
| Some problems      | 28.0      | 1,759 | 46.5     | 5,877  | 63.2      | 1,495 | 63.0     | 17 |
| Confined to bed    | 0.2       | 10    | 0.4      | 50     | 1.6       | 39    | 0.0      | 0  |
| Self-care          |           |       |          |        |           |       |          |    |
| No problem         | 95.5      | 5,992 | 90.2     | 11,398 | 80.8      | 1,911 | 63.0     | 17 |
| Some problems      | 4.0       | 251   | 8.6      | 1,081  | 15.8      | 374   | 29.6     | 8  |
| Unable to          | 0.5       | 33    | 1.2      | 157    | 3.4       | 81    | 7.4      | 2  |
| Usual activities   |           |       |          |        |           |       |          |    |
| No problem         | 85.5      | 5,365 | 73.5     | 9,291  | 57.3      | 1,355 | 44.4     | 12 |
| Some problems      | 13.2      | 830   | 23.1     | 2,924  | 35.8      | 848   | 51.9     | 14 |
| Unable to          | 1.3       | 81    | 3.3      | 421    | 6.9       | 163   | 3.7      | 1  |
| Pain/discomfort    |           |       |          |        |           |       |          |    |
| No problem         | 52.7      | 3,306 | 39.8     | 5,024  | 29.9      | 707   | 33.3     | 9  |
| Moderate problems  | 43.5      | 2,733 | 53.9     | 6,817  | 58.5      | 1,384 | 59.3     | 16 |
| Extreme problems   | 3.8       | 237   | 6.3      | 795    | 11.6      | 275   | 7.4      | 2  |
| Anxiety/depression |           |       |          |        |           |       |          |    |
| No problem         | 83.0      | 5,208 | 73.6     | 9,301  | 63.4      | 1,499 | 59.3     | 16 |
| Moderate problems  | 15.9      | 998   | 24.8     | 3,138  | 33.5      | 793   | 33.3     | 9  |
| Extreme problems   | 1.1       | 70    | 1.6      | 197    | 3.1       | 74    | 7.4      | 2  |

**Table S7: Mean EQ-5D indices based on the different value sets 6 years postoperatively (n=21,305)**

| ASA class | Value set   |            |            |        |             |            |            |        |
|-----------|-------------|------------|------------|--------|-------------|------------|------------|--------|
|           | Swedish VAS | German VAS | Danish VAS | UK VAS | Swedish TTO | German TTO | Danish TTO | UK TTO |
| Class I   |             |            |            |        |             |            |            |        |
| Mean      | 0.78        | 0.76       | 0.77       | 0.82   | 0.90        | 0.89       | 0.86       | 0.83   |
| SD        | 0.14        | 0.16       | 0.24       | 0.20   | 0.10        | 0.17       | 0.18       | 0.22   |
| Median    | 0.82        | 0.79       | 0.70       | 0.77   | 0.94        | 1.00       | 0.82       | 0.85   |
| Class II  |             |            |            |        |             |            |            |        |
| Mean      | 0.73        | 0.70       | 0.68       | 0.75   | 0.86        | 0.83       | 0.79       | 0.75   |
| SD        | 0.17        | 0.18       | 0.25       | 0.22   | 0.12        | 0.21       | 0.20       | 0.26   |
| Median    | 0.72        | 0.73       | 0.63       | 0.74   | 0.88        | 0.89       | 0.78       | 0.79   |
| Class III |             |            |            |        |             |            |            |        |
| Mean      | 0.66        | 0.63       | 0.58       | 0.66   | 0.81        | 0.75       | 0.71       | 0.65   |
| SD        | 0.18        | 0.19       | 0.26       | 0.24   | 0.14        | 0.26       | 0.25       | 0.31   |
| Median    | 0.70        | 0.65       | 0.57       | 0.69   | 0.83        | 0.79       | 0.76       | 0.72   |
| Class IV  |             |            |            |        |             |            |            |        |
| Mean      | 0.64        | 0.62       | 0.56       | 0.64   | 0.79        | 0.73       | 0.70       | 0.62   |
| SD        | 0.21        | 0.21       | 0.29       | 0.27   | 0.15        | 0.27       | 0.24       | 0.32   |
| Median    | 0.60        | 0.54       | 0.45       | 0.62   | 0.77        | 0.79       | 0.70       | 0.68   |
| Overall   |             |            |            |        |             |            |            |        |
| Mean      | 0.74        | 0.71       | 0.70       | 0.76   | 0.87        | 0.84       | 0.80       | 0.76   |
| SD        | 0.17        | 0.18       | 0.25       | 0.22   | 0.12        | 0.21       | 0.21       | 0.26   |
| Median    | 0.79        | 0.76       | 0.68       | 0.76   | 0.91        | 0.89       | 0.82       | 0.80   |



**Table S8: One-way ANOVA test of abilities of value sets to differentiate among ASA classes 6 years postoperatively (n=21,305)**

| Follow-up                              | Value sets  |            |                         |                     |             |                         |                         |                     |        |
|----------------------------------------|-------------|------------|-------------------------|---------------------|-------------|-------------------------|-------------------------|---------------------|--------|
|                                        | Swedish VAS | German VAS | Danish <sup>a</sup> VAS | UK <sup>a</sup> VAS | Swedish TTO | German <sup>a</sup> TTO | Danish <sup>a</sup> TTO | UK <sup>a</sup> TTO |        |
| <b>6-year postoperative</b>            |             |            |                         |                     |             |                         |                         |                     |        |
| Mean                                   | Class I     | 0.78       | 0.76                    | 0.77                | 0.82        | 0.90                    | 0.89                    | 0.86                | 0.83   |
|                                        | Class II    | 0.73       | 0.70                    | 0.68                | 0.75        | 0.86                    | 0.83                    | 0.79                | 0.75   |
|                                        | Class III   | 0.66       | 0.63                    | 0.58                | 0.66        | 0.81                    | 0.75                    | 0.71                | 0.65   |
|                                        | Class IV    | 0.64       | 0.62                    | 0.56                | 0.64        | 0.79                    | 0.73                    | 0.70                | 0.62   |
| Effect size [Eta squared ( $\eta^2$ )] |             | 0.053*     | 0.051*                  | 0.053*              | 0.049*      | 0.053*                  | 0.039*                  | 0.044*              | 0.043* |

<sup>a</sup> Hypothetical perspective

\*P-value < 0.001

**Table S9: OLS models of predictive effect of ASA class on HRQoL score by value set 6 years postoperatively (n=21,305)**

| Model components          | Model estimates         |                  |             |                  |            |                  |                         |                  |                     |                  |
|---------------------------|-------------------------|------------------|-------------|------------------|------------|------------------|-------------------------|------------------|---------------------|------------------|
|                           | Patient-reported EQ VAS |                  | Swedish VAS |                  | German VAS |                  | Danish VAS <sup>b</sup> |                  | UK VAS <sup>b</sup> |                  |
|                           | $\beta$                 | RSE <sup>a</sup> | $\beta$     | RSE <sup>a</sup> | $\beta$    | RSE <sup>a</sup> | $\beta$                 | RSE <sup>a</sup> | $\beta$             | RSE <sup>a</sup> |
| Intercept                 | 0.802*                  | 0.0024           | 0.785*      | 0.0018           | 0.762*     | 0.0020           | 0.774*                  | 0.0030           | 0.824               | 0.0025           |
| ASA class II              | -0.083*                 | 0.0031           | -0.058*     | 0.0023           | -0.063*    | 0.0025           | -0.094*                 | 0.0037           | -0.075              | 0.0032           |
| ASA class III             | -0.172*                 | 0.0053           | -0.127*     | 0.0042           | -0.132*    | 0.0043           | -0.193*                 | 0.0061           | -0.163              | 0.0056           |
| ASA class IV              | -0.181*                 | 0.0412           | -0.151*     | 0.0396           | -0.143*    | 0.0393           | -0.209*                 | 0.0556           | -0.181              | 0.0509           |
| R <sup>2</sup>            |                         | 0.0578           |             | 0.0527           |            | 0.0508           |                         | 0.0532           |                     | 0.0486           |
| MAE                       |                         | 0.170            |             | 0.130            |            | 0.144            |                         | 0.212            |                     | 0.171            |
| Normalized MAE            |                         | 0.174            |             | 0.181            |            | 0.204            |                         | 0.182            |                     | 0.159            |
| RMSE                      |                         | 0.210            |             | 0.161            |            | 0.172            |                         | 0.247            |                     | 0.216            |
| Normalized RMSE           |                         | 0.214            |             | 0.225            |            | 0.243            |                         | 0.212            |                     | 0.201            |
| Spearman Rank correlation |                         | 0.160            |             | 0.227            |            | 0.222            |                         | 0.192            |                     | 0.264            |

  

| Model components          | Swedish TTO |                  | German TTO <sup>b</sup> |                  | Danish TTO <sup>b</sup> |                  | UK TTO <sup>b</sup> |                  |
|---------------------------|-------------|------------------|-------------------------|------------------|-------------------------|------------------|---------------------|------------------|
|                           | $\beta$     | RSE <sup>a</sup> | $\beta$                 | RSE <sup>a</sup> | $\beta$                 | RSE <sup>a</sup> | $\beta$             | RSE <sup>a</sup> |
| Intercept                 | 0.902*      | 0.0012           | 0.889*                  | 0.0022           | 0.856*                  | 0.0022           | 0.831               | 0.0028           |
| ASA class II              | -0.040*     | 0.0016           | -0.058*                 | 0.0028           | -0.064*                 | 0.0029           | -0.079              | 0.0036           |
| ASA class III             | -0.091*     | 0.0030           | -0.139*                 | 0.0057           | -0.147*                 | 0.0056           | -0.182              | 0.0070           |
| ASA Class IV              | -0.113*     | 0.0289           | -0.157*                 | 0.0508           | -0.153*                 | 0.0445           | -0.205              | 0.0614           |
| R <sup>2</sup>            |             | 0.0532           |                         | 0.0386           |                         | 0.0442           |                     | 0.0425           |
| MAE                       |             | 0.091            |                         | 0.207            |                         | 0.147            |                     | 0.182            |
| Normalized MAE            |             | 0.144            |                         | 0.172            |                         | 0.090            |                     | 0.114            |
| RMSE                      |             | 0.115            |                         | 0.241            |                         | 0.202            |                     | 0.256            |
| Normalized RMSE           |             | 0.182            |                         | 0.200            |                         | 0.124            |                     | 0.160            |
| Spearman Rank correlation |             | 0.232            |                         | 0.214            |                         | 0.169            |                     | 0.118            |

<sup>a</sup>Heteroskedasticity-consistent standard error;

<sup>b</sup>Hypothetical perspective

MAE: mean absolute error;

RSE: robust standard error;

RMSE: root mean square error;

\*P<0.001

**Table S10: Adjusted OLS models ASA class on HRQoL score by value sets 6 years postoperatively (n=21,305)**

| Model components            | Value sets/EQ VAS       |             |            |                         |                     |             |                         |                         |                     |
|-----------------------------|-------------------------|-------------|------------|-------------------------|---------------------|-------------|-------------------------|-------------------------|---------------------|
|                             | Patient-reported EQ VAS | Swedish VAS | German VAS | Danish <sup>h</sup> VAS | UK <sup>h</sup> VAS | Swedish TTO | German <sup>h</sup> TTO | Danish <sup>h</sup> TTO | UK <sup>h</sup> TTO |
| Intercept                   | 0.861***                | 0.847***    | 0.839***   | 0.880***                | 0.914***            | 0.942***    | 0.967***                | 0.929***                | 0.924***            |
| ASA class <sup>a</sup>      |                         |             |            |                         |                     |             |                         |                         |                     |
| Class II                    | -0.034***               | -0.016***   | -0.015***  | -0.024***               | -0.020***           | -0.011***   | -0.013***               | -0.017***               | -0.020***           |
| Class III                   | -0.074***               | -0.043***   | -0.038***  | -0.057***               | -0.052***           | -0.033***   | -0.047***               | -0.052***               | -0.064***           |
| Class IV                    | -0.050                  | -0.039      | -0.016     | -0.029                  | -0.034              | -0.036*     | -0.038                  | -0.027                  | -0.048              |
| Age group <sup>b</sup>      |                         |             |            |                         |                     |             |                         |                         |                     |
| 50-59                       | 0.019**                 | 0.010*      | 0.007      | 0.013*                  | 0.011*              | 0.007*      | 0.007                   | 0.012*                  | 0.013               |
| 60-69                       | 0.027***                | 0.016***    | 0.012**    | 0.018**                 | 0.018***            | 0.012***    | 0.013*                  | 0.020***                | 0.023***            |
| 70-79                       | -0.002                  | 0.002       | 0.0002     | -0.005                  | 0.003               | 0.002       | 0.003                   | 0.007                   | 0.009               |
| 80-98                       | -0.044***               | -0.041***   | -0.037***  | -0.071***               | -0.054***           | -0.032***   | -0.046***               | -0.042***               | -0.054***           |
| Sex <sup>c</sup>            |                         |             |            |                         |                     |             |                         |                         |                     |
| Female                      | -0.012***               | -0.017***   | -0.019***  | -0.026***               | -0.022***           | -0.011***   | -0.016***               | -0.021***               | -0.025***           |
| BMI category <sup>d</sup>   |                         |             |            |                         |                     |             |                         |                         |                     |
| Normal weight               | 0.022                   | 0.017       | 0.021      | 0.035*                  | 0.021               | 0.013       | 0.010                   | 0.019                   | 0.020               |
| Overweight                  | 0.025                   | 0.018       | 0.021*     | 0.038*                  | 0.024               | 0.014       | 0.011                   | 0.022                   | 0.014               |
| Obese class I               | 0.020                   | 0.017       | 0.018      | 0.033*                  | 0.019               | 0.013       | 0.005                   | 0.017                   | 0.018               |
| Obese class II              | 0.009                   | 0.006       | 0.006      | 0.022                   | 0.010               | 0.005       | -0.005                  | 0.010                   | 0.008               |
| Obese class III             | -0.004                  | -0.011      | -0.010     | 0.044                   | -0.010              | -0.008      | -0.026                  | -0.009                  | -0.018              |
| Laterality <sup>e</sup>     |                         |             |            |                         |                     |             |                         |                         |                     |
| Left                        | -0.007*                 | -0.002      | -0.002     | -0.002                  | -0.002              | -0.002      | -0.002                  | -0.002                  | -0.002              |
| Charnley class <sup>f</sup> |                         |             |            |                         |                     |             |                         |                         |                     |
| Category B                  | -0.070**                | -0.063***   | -0.087***  | -0.150***               | -0.116***           | -0.040***   | -0.075***               | -0.091***               | -0.110***           |
| Category C                  | -0.185***               | -0.168***   | -0.196***  | -0.291***               | -0.231***           | -0.115***   | -0.182***               | -0.196***               | -0.241***           |
| Hip pain level <sup>g</sup> |                         |             |            |                         |                     |             |                         |                         |                     |
| Very mild                   | -0.077***               | -0.057***   | -0.077***  | -0.119***               | -0.087***           | -0.037***   | -0.050***               | -0.067***               | -0.080***           |
| Mild                        | -0.138***               | -0.108***   | -0.121***  | -0.154***               | -0.123***           | -0.074***   | -0.094***               | -0.105***               | -0.132***           |
| Moderate                    | -0.265***               | -0.246***   | -0.248***  | -0.262***               | -0.309***           | -0.175***   | -0.362***               | -0.330***               | -0.439***           |
| Severe                      | -0.325***               | -0.340***   | -0.329***  | -0.339***               | -0.432***           | -0.258***   | -0.548***               | -0.550***               | -0.669***           |
| Adjusted R <sup>2</sup>     | 0.388                   | 0.498       | 0.546      | 0.533                   | 0.491               | 0.475       | 0.407                   | 0.449                   | 0.437               |
| MAE                         | 0.131                   | 0.087       | 0.091      | 0.140                   | 0.120               | 0.061       | 0.099                   | 0.107                   | 0.134               |
| Normalized MAE              | 0.134                   | 0.121       | 0.129      | 0.120                   | 0.112               | 0.097       | 0.082                   | 0.066                   | 0.084               |
| RMSE                        | 0.169                   | 0.117       | 0.119      | 0.174                   | 0.158               | 0.085       | 0.160                   | 0.153                   | 0.196               |
| Normalized RMSE             | 0.173                   | 0.164       | 0.168      | 0.149                   | 0.147               | 0.136       | 0.133                   | 0.094                   | 0.123               |
| Spearman Rank correlation   | 0.631                   | 0.717       | 0.736      | 0.730                   | 0.727               | 0.724       | 0.724                   | 0.711                   | 0.715               |

Reference group: <sup>a</sup> Class I; <sup>b</sup> < 50; <sup>c</sup> Male; <sup>d</sup> Underweight; <sup>e</sup> Right; <sup>f</sup> Category A; <sup>g</sup> None; <sup>h</sup> hypothetical perspective; \*P-value<0.05; \*\*P-value<0.01; \*\*\*P-value<0.001

**Table S11: Post hoc Bonferroni adjusted p-values of pairwise tests of the one-way ANOVA test for abilities of value sets to differentiate among ASA classes 6 years postoperatively (n=21,305)**

| Comparison          | P-value     |            |                         |                     |             |                         |                         |                     |
|---------------------|-------------|------------|-------------------------|---------------------|-------------|-------------------------|-------------------------|---------------------|
|                     | Swedish VAS | German VAS | Danish VAS <sup>a</sup> | UK VAS <sup>a</sup> | Swedish TTO | German TTO <sup>a</sup> | Danish TTO <sup>a</sup> | UK TTO <sup>a</sup> |
| Class I, Class II   | <0.001      | <0.001     | <0.001                  | <0.001              | <0.001      | <0.001                  | <0.001                  | <0.001              |
| Class I, Class III  | <0.001      | <0.001     | <0.001                  | <0.001              | <0.001      | <0.001                  | <0.001                  | <0.001              |
| Class I, Class IV   | <0.001      | <0.001     | <0.001                  | <0.001              | <0.001      | 0.001                   | 0.001                   | <0.001              |
| Class II, Class III | <0.001      | <0.001     | <0.001                  | <0.001              | <0.001      | <0.001                  | <0.001                  | <0.001              |
| Class II, Class IV  | 0.017       | 0.095      | 0.094                   | 0.066               | 0.006       | 0.070                   | 0.133                   | 0.062               |
| Class III, Class IV | 1.000       | 1.000      | 1.000                   | 1.000               | 1.000       | 1.000                   | 1.000                   | 1.000               |

<sup>a</sup> Hypothetical perspective

**Table S12: Kruskal Wallis rank sum Test to assess abilities of value sets to differentiate HRQoL by ASA class, 6 years postoperatively (n=21,305)**

| ASA class | Kruskal Wallis X <sup>2</sup> |            |            |         |             |            |            |         |
|-----------|-------------------------------|------------|------------|---------|-------------|------------|------------|---------|
|           | Swedish VAS                   | German VAS | Danish VAS | UK VAS  | Swedish TTO | German TTO | Danish TTO | UK TTO  |
| Class I   |                               |            |            |         |             |            |            |         |
| Class II  | 1146.2*                       | 1082.1*    | 1196.2*    | 1105.2* | 1187.7*     | 1019.2*    | 1083.5*    | 1046.1* |
| Class III |                               |            |            |         |             |            |            |         |
| Class IV  |                               |            |            |         |             |            |            |         |

<sup>a</sup>hypothetical perspective

\*P-value<0.001

## A list of R packages used in the analysis

### 1. **car: Companion to Applied Regression**

Fox J, Weisberg S (2019). *An R Companion to Applied Regression*, Third edition. Sage, Thousand Oaks CA. <https://socialsciences.mcmaster.ca/jfox/Books/Companion/>.

### 2. **dplyr**

Hadley Wickham, Romain François, Lionel Henry and Kirill Müller (2019). dplyr: A Grammar of Data Manipulation. R package version 0.8.3. <https://CRAN.R-project.org/package=dplyr>

### 3. **ggplot2**

H. Wickham. ggplot2: Elegant Graphics for Data Analysis. Springer-Verlag New York, 2016.

### 4. **gvlma**

Edsel A. Pena and Elizabeth H. Slate (2019). gvlma: Global Validation of Linear Models Assumptions. R package version 1.0.0.3. <https://CRAN.R-project.org/package=gvlma>

### 5. **lmtest**

Achim Zeileis, Torsten Hothorn (2002). Diagnostic Checking in Regression Relationships. R News 2(3), 7-10. URL <https://CRAN.R-project.org/doc/Rnews/>

### 6. **Metrics**

Ben Hamner and Michael Frasco (2018). Metrics: Evaluation Metrics for Machine Learning. R package version 0.1.4. <https://CRAN.R-project.org/package=Metrics>

### 7. **sandwich**

Zeileis A (2004). "Econometric Computing with HC and HAC Covariance Matrix Estimators." *Journal of Statistical Software*, \*11\*(10), 1-17. doi: 10.18637/jss.v011.i10 (URL:<https://doi.org/10.18637/jss.v011.i10>).

### 8. **SimDesign**

Phil Chalmers (2020). SimDesign: Structure for Organizing Monte Carlo Simulation Designs. R package version 2.0.1. <https://CRAN.R-project.org/package=SimDesign>

### 9. **sjstats**

Lüdecke D (2019). *\_sjstats: Statistical Functions for Regression Models (Version 0.17.7)*. doi: 10.5281/zenodo.1284472 (URL: <https://doi.org/10.5281/zenodo.1284472>), <URL: <https://CRAN.R-project.org/package=sjstats>>.

### 10. **RVAideMemoire**

Maxime Hervé (2020). RVAideMemoire: Testing and Plotting Procedures for Biostatistics. R package version 0.9-74. <https://CRAN.R-project.org/package=RVAideMemoire>

### 11. **DescTools**

al. ASem (2020). DescTools: Tools for Descriptive Statistics. R package version 0.99.34, <https://cran.r-project.org/package=DescTools>.

### 12. **Kendall**

A.I. McLeod (2011). Kendall: Kendall rank correlation and Mann-Kendall trend test <http://www.stats.uwo.ca/faculty/aim>
